# Supplementary material for: Pinched flow coupled shear-modulated inertial microfluidics for high-throughput rare blood cell separation
Source: Royal Society of Chemistry journal article supplement (doi:10.1039/c0lc00633e), 2011-01-01
Supplement: c0lc00633e.pdf [file c0lc00633e.pdf]

## Pinched flow coupled shear modulated inertial microfluidics for high throughput rare blood cell separation

Ali Asgar. S. Bhagat, Han Wei Hou, Leon D. Li, Chwee Teck Lim, Jongyoon Han

### SUPPORTING INFORMATION

**Figure S1.**

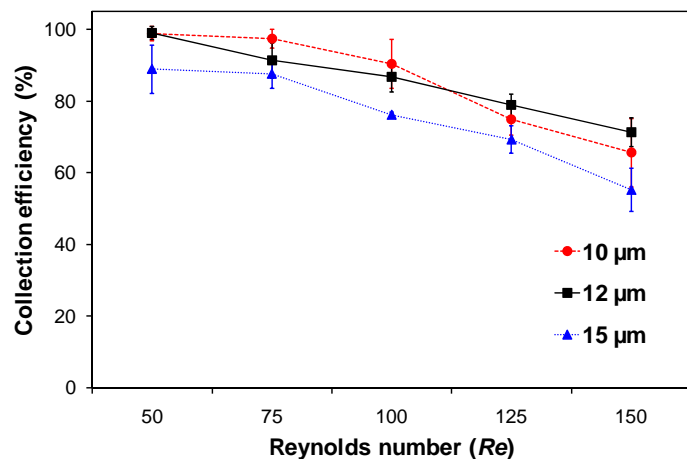

Plot presenting the effect of channel width on collection efficiency of MDA-MB-231 cells for increasing  $Re$ .

**Figure S2.**

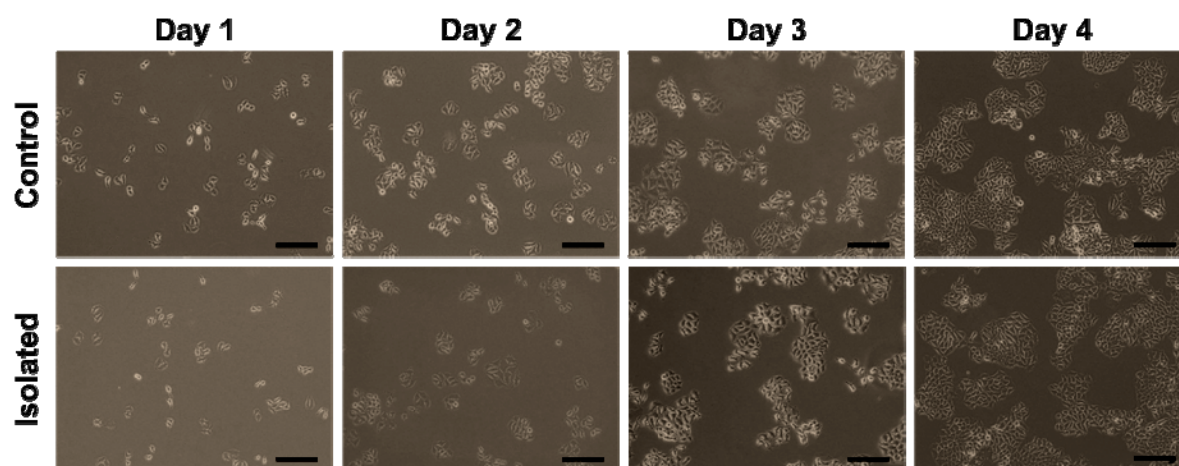

Phase contrast micrographs of cultures of control (unsorted) MCF-7 cells and cells isolated from the center outlet of the microfluidic device. The images indicate no significant differences between the morphology and proliferation rate of the MCF-7 cells suggesting high viability and sterility. bar = 200 μm

**Figure S3.**

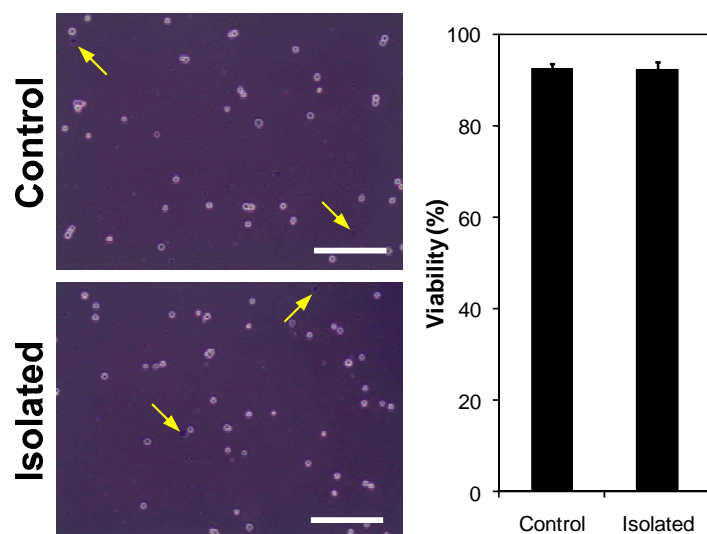

Phase contrast micrographs of control (unsorted) and sorted MCF-7 cells stained using trypan-blue dye indicating cell viability (arrows indicate non-viable cells). The results confirms that the high shear experienced by the cells in these microchannels due to the high flowrates do not compromise their viability, retrieving >90% viable cells. bar = 200  $\mu$ m

**Figure S4.**

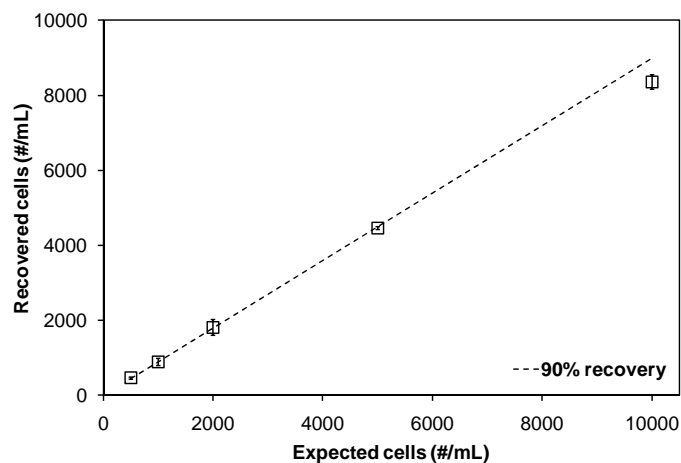

Plot presenting the number of CTCs recovered as a function of increasing spiking concentrations. The data illustrates ~90% CTC recovery rate.

**Figure S5.**

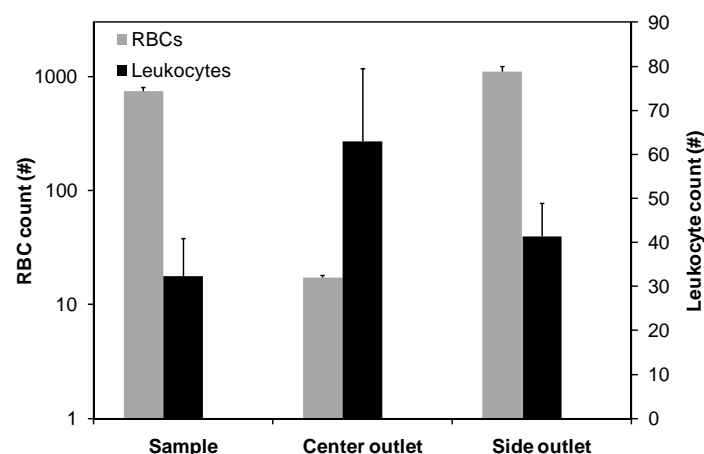

Experimental results for leukocyte separation from blood. By simply tuning the width of the pinching region to 8  $\mu\text{m}$  we were able to achieve a 100 fold leukocyte enrichment from the center outlet with a single run through the device, demonstrating the versatility of the developed microfluidic device towards other blood separation applications.

## **SI Movie Legends**

### **Movie 1**

High speed video (1 kHz) captured at the outlet region indicating the strong focusing of RBCs into two bands along the channel sidewalls in aspect ratio 3.75 microchannel at  $Re = 100$  (1% hematocrit). The video clearly illustrates the emergence of a prominent cell-free region at the center of the microchannel.

### **Movie 2**

High speed video (10 kHz) illustrating the isolation of CTCs at the outlet of the device for experiments conducted with MCF-7 cells spiked in 1.5-2% hematocrit sample at  $Re = 100$  flows. Due to the high hematocrit (volume fraction), the arrival of CTCs is always accompanied with a few scattered and unfocused blood cells which are also collected at the center outlet. The high RBC density limits our ability to identify PBL in the video.

### **Movie 3**

High speed video (10 kHz) captured at the outlet of the 2<sup>nd</sup> stage shows complete isolation of the MCF-7 cells from the center outlet. A 5.5  $\log_{10}$  fold CTC enrichment is achieved using a cascaded configuration by connecting two devices in series.

### **Movie 4**

Representative schematic and operation of a 4-channel parallel microfluidic device allowing the processing of ~4 mL of whole blood an hour. The video shows the outlet-section of the microchannel at  $Re = 100$  flowrate.
